# Supplementary material
Source: Elsevier journal article supplement (https://www.sciencedirect.com/science/article/pii/S0001731020304725)
Supplement: mmc1 [file S0001731020304725:mmc1.pdf]

## Encuesta Hábitos de Fotoprotección

### DATOS DE REALIZACIÓN DE ENCUESTA

Este cuestionario es la herramienta para conocer las conductas, actitudes y conocimientos relacionados con la exposición solar de nuestra comunidad.

Todos los datos recogidos en este proyecto serán registrados de forma anónima, siguiendo estrictamente las leyes y normas de protección de datos en vigor (Ley 41/2002 de 14 de noviembre; Ley 15/1999 de 15 de diciembre). Su consentimiento para la participación en el estudio se constatará con su cumplimentación.

### 1. DATOS PERSONALES Y DEMOGRÁFICOS

|                                                                                                  |
|--------------------------------------------------------------------------------------------------|
| <b>Nombre Completo:</b>                                                                          |
| <b>Correo electrónico:</b>                                                                       |
| <b>Sexo:</b>                                                                                     |
| <b>¿Qué edad tiene?:</b>                                                                         |
| <b>¿Cuál es su país de nacimiento?:</b>                                                          |
| <b>¿Cuál es su municipio de residencia?:</b>                                                     |
| <b>¿Cuál es su nivel de estudios?:</b>                                                           |
| <b>¿Cuál es su profesión?:</b>                                                                   |
| <b>¿Cuál es su estado civil actual?:</b>                                                         |
| <b>¿Tiene hijos menores de 12 años?:</b> Si <input type="checkbox"/> No <input type="checkbox"/> |

### 2. HABITOS DEPORTIVOS

|                                                                                                                                                                                                                               |
|-------------------------------------------------------------------------------------------------------------------------------------------------------------------------------------------------------------------------------|
| <b>¿Cuántos años llevas corriendo?</b> Menos de 1 año <input type="checkbox"/> De 1 a 5 a. <input type="checkbox"/> De 6 a 15 a. <input type="checkbox"/> Más de 15 a. <input type="checkbox"/>                               |
| <b>En los últimos 12 meses, ¿cuántas pruebas de más de 10 Km has completado?</b><br>Ninguna <input type="checkbox"/> De 1 a 5 <input type="checkbox"/> De 6 a 10 <input type="checkbox"/> Más de 10. <input type="checkbox"/> |
| <b>En los últimos 12 meses, ¿cuál es la máxima distancia recorrida en una sesión de entrenamiento o de competición? (en kilómetros)</b>                                                                                       |

### 3. FOTOTIPO DE PIEL

|                                                                                                                                                                                                          |
|----------------------------------------------------------------------------------------------------------------------------------------------------------------------------------------------------------|
| <b>¿Cuál es su color natural de su piel?</b>                                                                                                                                                             |
| Muy clara (tipo 1) <input type="checkbox"/> Clara (tipo 2) <input type="checkbox"/> Intermedia (tipo 3) <input type="checkbox"/> Morena (tipo 4) <input type="checkbox"/> Negra <input type="checkbox"/> |

(tipo 5) ☐

**¿Cómo reacciona su piel cuando la expone al sol del mediodía una hora al inicio del verano?**

- ☐ Tengo una quemadura dolorosa al día siguiente y no me bronceo al cabo de 1 semana
- ☐ Tengo una quemadura dolorosa al día siguiente y me bronceo ligeramente a la semana
- ☐ Tengo una quemadura suave al día siguiente y me bronceo moderadamente al cabo de 1 semana
- ☐ No me quemo al día siguiente y me bronceo intensamente al cabo de 1 semana

**4. HÁBITOS DE EXPOSICIÓN SOLAR**

**¿Cuántos días al año se expone al sol realizando actividades al aire libre?**

Baños de sol (playa, piscina, solárium): *Ningún día* ☐ *1-5 días* ☐ *6-30 días* ☐ *31-90 días* ☐  
*Más de 90 días* ☐

Deportes al aire libre: *Ningún día* ☐ *1-5 días* ☐ *6-30 días* ☐ *31-90 días* ☐ *Más de 90 días* ☐

Trabajos al aire libre: *Ningún día* ☐ *1-5 días* ☐ *6-30 días* ☐ *31-90 días* ☐ *Más de 90 días* ☐

**¿Cuántas horas al día se suele exponer al sol realizando actividades al aire libre?**

Baños de sol (playa, piscina, solárium): *1-2 horas* ☐ *3-4 horas* ☐ *5-6 horas* ☐ *Más de 6 horas* ☐

Deportes al aire libre: *1-2 horas* ☐ *3-4 horas* ☐ *5-6 horas* ☐ *Más de 6 horas* ☐

Trabajos al aire libre: *1-2 horas* ☐ *3-4 horas* ☐ *5-6 horas* ☐ *Más de 6 horas* ☐

**5. QUEMADURAS SOLARES EN ÚLTIMO AÑO**

**¿Cuántas veces se ha quemado la piel (enrojecimiento y dolor) en el último año?**

*Ninguna* ☐ *1-2 veces* ☐ *3-5 veces* ☐ *6-10 veces* ☐ *Más de 10 veces* ☐

**6. PRÁCTICAS DE PROTECCIÓN SOLAR**

**Medidas:**

Me resguardo a la sombra / Uso sombrilla: *Nunca* ☐ *Casi nunca* ☐ *A veces* ☐ *Casi siempre* ☐ *Siempre* ☐

Uso gafas de sol: *Nunca* ☐ *Casi nunca* ☐ *A veces* ☐ *Casi siempre* ☐ *Siempre* ☐

|                                                                                                                                                                                                                                                               |
|---------------------------------------------------------------------------------------------------------------------------------------------------------------------------------------------------------------------------------------------------------------|
| Uso sombrero o gorra: <i>Nunca</i> <input type="checkbox"/> <i>Casi nunca</i> <input type="checkbox"/> <i>A veces</i> <input type="checkbox"/> <i>Casi siempre</i> <input type="checkbox"/> <i>Siempre</i> <input type="checkbox"/>                           |
| Uso camiseta con manga y pantalón largo: <i>Nunca</i> <input type="checkbox"/> <i>Casi nunca</i> <input type="checkbox"/> <i>A veces</i> <input type="checkbox"/> <i>Casi siempre</i> <input type="checkbox"/> <i>Siempre</i> <input type="checkbox"/>        |
| Evito las horas del mediodía (12:00 a 16:00 h): <i>Nunca</i> <input type="checkbox"/> <i>Casi nunca</i> <input type="checkbox"/> <i>A veces</i> <input type="checkbox"/> <i>Casi siempre</i> <input type="checkbox"/> <i>Siempre</i> <input type="checkbox"/> |
| Uso cremas de protección solar: <i>Nunca</i> <input type="checkbox"/> <i>Casi nunca</i> <input type="checkbox"/> <i>A veces</i> <input type="checkbox"/> <i>Casi siempre</i> <input type="checkbox"/> <i>Siempre</i> <input type="checkbox"/>                 |

|                                                                                                                                                                  |
|------------------------------------------------------------------------------------------------------------------------------------------------------------------|
| <b>Quando utiliza cremas de protección solar, ¿Qué índice de protección solar suele usar?</b>                                                                    |
| No lo sé <input type="checkbox"/> 2-10 <input type="checkbox"/> 11-20 <input type="checkbox"/> 21-50 <input type="checkbox"/> mas de 50 <input type="checkbox"/> |

## 7. ACTITUDES

|                                                       | Totalmente<br>en<br>desacuerdo | Desacuerdo               | Indiferente              | De<br>acuerdo            | Totalmente<br>de acuerdo |
|-------------------------------------------------------|--------------------------------|--------------------------|--------------------------|--------------------------|--------------------------|
| Me gusta tomar el sol                                 | <input type="checkbox"/>       | <input type="checkbox"/> | <input type="checkbox"/> | <input type="checkbox"/> | <input type="checkbox"/> |
| Me gusta estar moreno/a                               | <input type="checkbox"/>       | <input type="checkbox"/> | <input type="checkbox"/> | <input type="checkbox"/> | <input type="checkbox"/> |
| Tomar el sol me sienta bien                           | <input type="checkbox"/>       | <input type="checkbox"/> | <input type="checkbox"/> | <input type="checkbox"/> | <input type="checkbox"/> |
| No me gusta usar cremas de protección solar           | <input type="checkbox"/>       | <input type="checkbox"/> | <input type="checkbox"/> | <input type="checkbox"/> | <input type="checkbox"/> |
| Merece la pena usar cremas de protección solar        | <input type="checkbox"/>       | <input type="checkbox"/> | <input type="checkbox"/> | <input type="checkbox"/> | <input type="checkbox"/> |
| A mediodía, prefiero estar a la sombra que al sol     | <input type="checkbox"/>       | <input type="checkbox"/> | <input type="checkbox"/> | <input type="checkbox"/> | <input type="checkbox"/> |
| Me preocupa quemarme cuando tomo el sol               | <input type="checkbox"/>       | <input type="checkbox"/> | <input type="checkbox"/> | <input type="checkbox"/> | <input type="checkbox"/> |
| Me preocupan las manchas y arrugas por el sol         | <input type="checkbox"/>       | <input type="checkbox"/> | <input type="checkbox"/> | <input type="checkbox"/> | <input type="checkbox"/> |
| Me preocupa que pueda tener cáncer de piel por el sol | <input type="checkbox"/>       | <input type="checkbox"/> | <input type="checkbox"/> | <input type="checkbox"/> | <input type="checkbox"/> |
| Es fácil protegerse del sol con sombrero y ropa       | <input type="checkbox"/>       | <input type="checkbox"/> | <input type="checkbox"/> | <input type="checkbox"/> | <input type="checkbox"/> |

## 8. CONOCIMIENTOS

|                                                                                             | Verdadero                | Falso                    |
|---------------------------------------------------------------------------------------------|--------------------------|--------------------------|
| El uso de cabinas de rayos UVA antes de los 30 años aumenta en un 75% el riesgo de melanoma | <input type="checkbox"/> | <input type="checkbox"/> |

|                                                                                                        |                          |                          |
|--------------------------------------------------------------------------------------------------------|--------------------------|--------------------------|
| La radiación ultravioleta produce envejecimiento de la piel y diversos tipos de cáncer de piel         | <input type="checkbox"/> | <input type="checkbox"/> |
| Estando en la sombra, no corremos riesgo de sufrir los efectos de la radiación solar                   | <input type="checkbox"/> | <input type="checkbox"/> |
| Las cremas fotoprotectoras es la forma más adecuada de protegerse del sol y prevenir el cáncer de piel | <input type="checkbox"/> | <input type="checkbox"/> |
| Una vez que la piel de ha puesto morena no es necesario usar cremas de protección solar                | <input type="checkbox"/> | <input type="checkbox"/> |
| Los bebes de menos de 1 año no deben exponerse directamente al sol                                     | <input type="checkbox"/> | <input type="checkbox"/> |
| Es necesario extremar usar medidas de protección solar cuando el índice UVI es superior a 3            | <input type="checkbox"/> | <input type="checkbox"/> |
| La ropa oscura protege del sol más que la ropa clara                                                   | <input type="checkbox"/> | <input type="checkbox"/> |
| Es recomendable tomar al menos 1 h. de sol al día para garantizar unos niveles adecuados de Vit. D     | <input type="checkbox"/> | <input type="checkbox"/> |
| Los niños deben usar cremas de protección solar con un índice igual o mayor a 30                       | <input type="checkbox"/> | <input type="checkbox"/> |
